# Supplementary material for: Historical gains in soybean (Glycine max Merr.) seed yield are driven by linear increases in light interception, energy conversion, and partitioning efficiencies
Source: PubMed Central journal article supplement (PMC4071847; doi:10.1093/jxb/eru187), 2014-04-30
Supplement: supp_eru187_jexbot123141_file001.pdf [file supp_eru187_jexbot123141_file001.pdf]

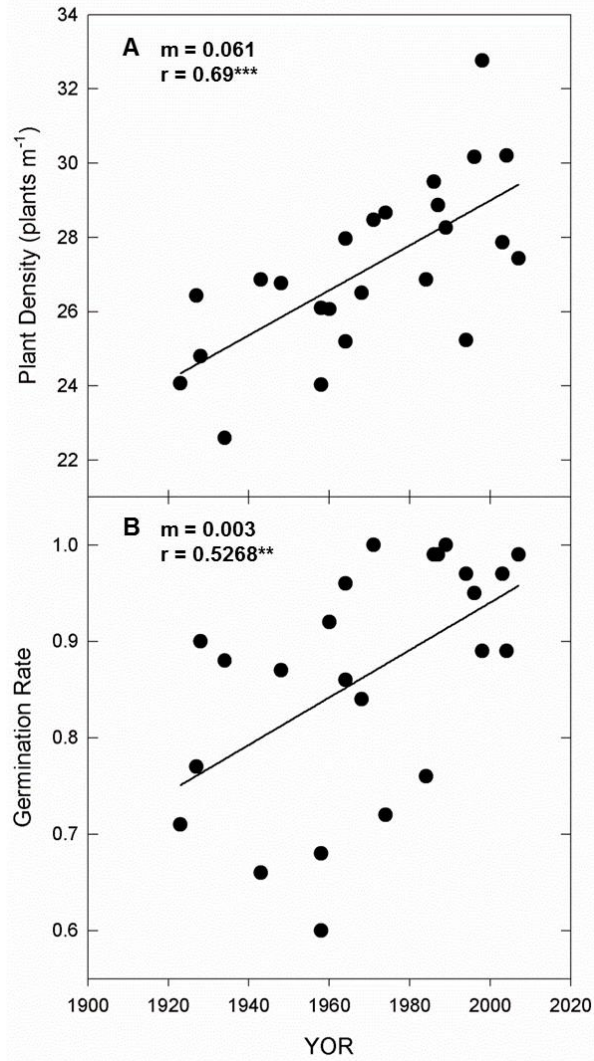

**Figure S1. Plant density and seed germination versus YOR in 2011.** Planting density (A) and germination rate (B) plotted against cultivar YOR. All lines represent the least squares regression (\*\* $p < 0.01$ , \*\*\*  $p < 0.001$ ).

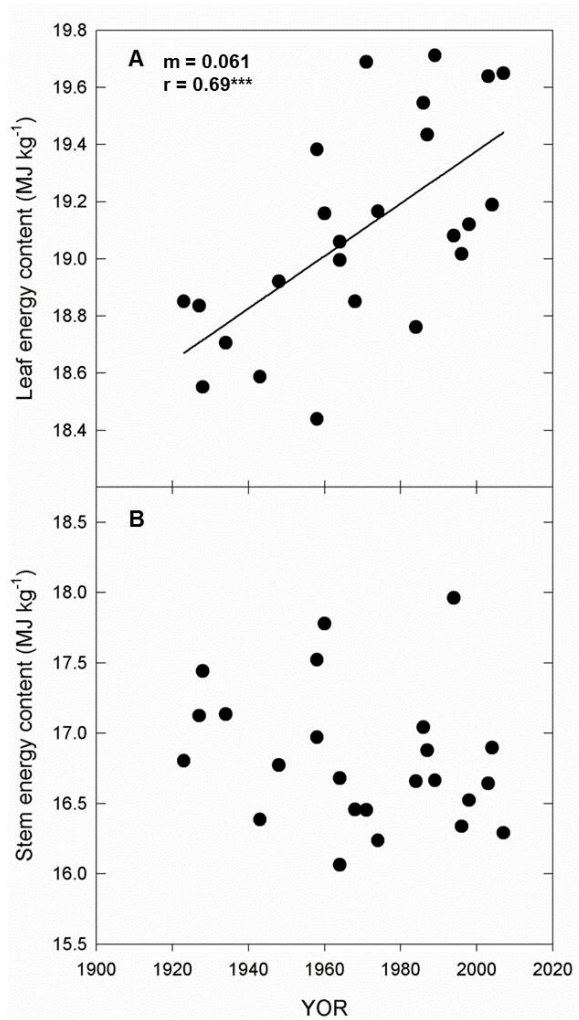

**Figure S2. Leaf and stem energy content versus YOR.** Leaf and stem energy content is plotted against cultivar YOR with the line representing the least squares regression (\*\*\*)  $p < 0.001$ .

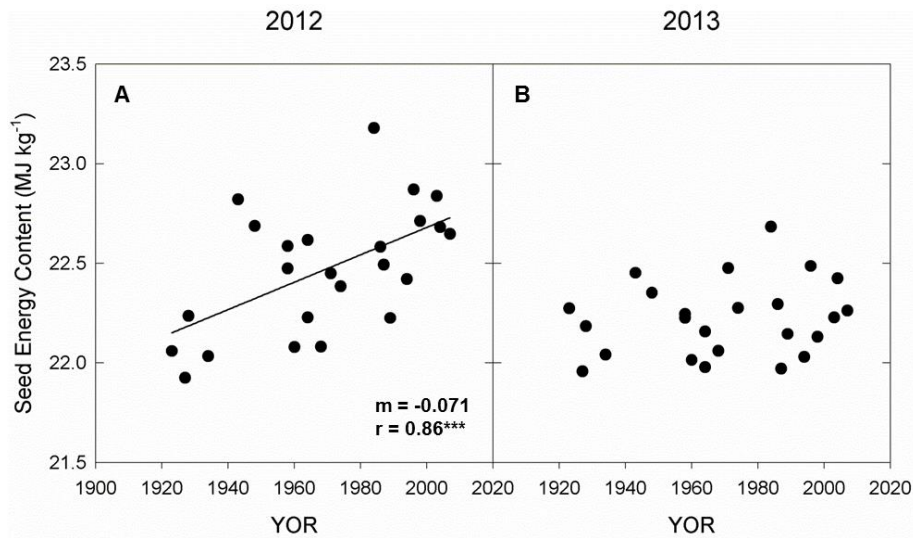

**Figure S3. Seed composition versus YOR in 2012 and 2013.** The energy content (A, B) of the seed is shown plotted against YOR in 2012 and 2013. All lines represent the least squares regression (\*\*\*)  $p < 0.001$ .

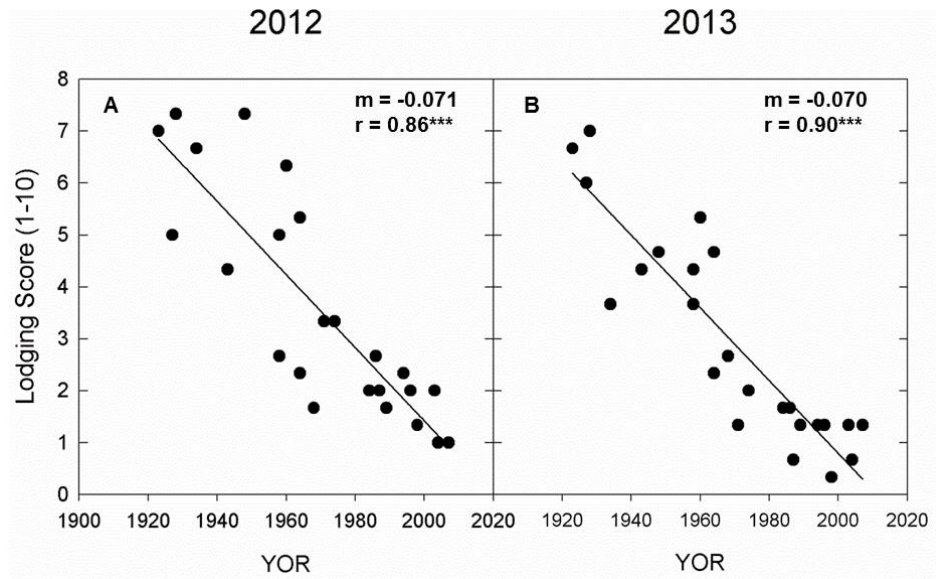

**Figure S4. Lodging score versus YOR in 2012 and 2013.** Lodging score is plotted against cultivar YOR with the line representing the least squares regression ( $*** p < 0.001$ ). Each point is the average of three replicates.
